# Supplementary material for: Insulin Signaling in Intestinal Stem and Progenitor Cells as an Important Determinant of Physiological and Metabolic Traits in Drosophila
Source: PubMed Central journal article supplement (PMC7226132; doi:10.3390/cells9040803), 2020-03-26
Supplement: cells-09-00803-s001.pdf [file cells-09-00803-s001.pdf]

**Table S1.** Statistical analysis of lifespan and stress resistance of the experimental flies with inhibited/activated IIS in ISCs and EBs.

|                                  | <i>Esc/</i>    | +   | <i>InR-RNAi</i> | <i>Pten-RNAi</i> |
|----------------------------------|----------------|-----|-----------------|------------------|
| Lifespan (days)                  | N              | 100 | 95              | 100              |
|                                  | Mean           | 26  | 2               | 24               |
|                                  | Difference, %  |     | -92             | -7               |
|                                  | $\chi^2$       |     | 144             | 2.2              |
|                                  | <i>p</i> value |     | <0.0001         | 0.139            |
| Starvation resistance (hours)    | N              | 60  | 45              | 60               |
|                                  | Mean           | 84  | 47              | 77               |
|                                  | Difference, %  |     | -60             | -8               |
|                                  | $\chi^2$       |     | 90              | 10               |
|                                  | <i>p</i> value |     | <0.0001         | 0.001            |
| Malnutrition 1%S (days)          | N              | 60  | 75              | 45               |
|                                  | Mean           | 7   | 6               | 6                |
|                                  | Difference, %  |     | -16             | -8               |
|                                  | $\chi^2$       |     | 6               | 5                |
|                                  | <i>p</i> value |     | 0.013           | 0.020            |
| Malnutrition 1%AY (days)         | N              | 60  | 45              | 30               |
|                                  | Mean           | 9   | 7               | 6                |
|                                  | Difference, %  |     | -19             | -33              |
|                                  | $\chi^2$       |     | 3               | 11               |
|                                  | <i>p</i> value |     | 0.081           | 0.001            |
| Malnutrition 0.5%S-0.5%AY (days) | N              | 60  | 75              | 45               |
|                                  | Mean           | 20  | 9               | 20               |
|                                  | Difference, %  |     | -56             | -4               |
|                                  | $\chi^2$       |     | 59              | 3                |
|                                  | <i>p</i> value |     | <0.0001         | 0.09             |

Survival between groups was compared by Log-rank test.

**Table S2.** Primer pairs used for qRT-PCR.

| <b>Abbreviation</b> | <b>Primer Pairs</b>                                        |
|---------------------|------------------------------------------------------------|
| <i>rp49</i>         | F: ATCGGTTACGGATCGAACAA<br>R: GACAATCTCCTTGCGCTTCT         |
| <i>crq</i>          | F: CAGAGCTCTCCTCCGAATTG<br>R: ATGCCGGTGATGAGAAAGAC         |
| <i>dilp2</i>        | F: AGCAAGCCTTTGTCCTTCATCTC<br>R: ACACCATACTCAGCACCTCGTTG   |
| <i>dilp3</i>        | F: TGTGTGTATGGCTTCAACGCAATG<br>R: CACTCAACAGTCTTTCCAGCAGGG |
| <i>dilp5</i>        | F: GAGGCACCTTGGGCCTATTC<br>R: CATGTGGTGAGATTCGG            |
| <i>dilp6</i>        | F: CCCTGGCGATGTATTTCCCAACA<br>R: CCGACTTGCACACAAATCGGTTA   |
| <i>akh</i>          | F: AGACCTCCAACGAAATGCTG<br>R: GTGCTTGCAGTCCAGAAAGAG        |
| <i>pepck</i>        | F: TCAATGGCGAATCCTGCTAC<br>R: TCCTTCACGTCCACCTTATCC        |
| <i>tobi</i>         | F: CCACCAAGCGAGACATTTACC<br>R: GAGCGGCGTAGTCCATCAC         |
| <i>bmm</i>          | F: GGTCCCTTCAGTCCCTCCTT<br>R: GCTTGTGAGCATCGTCTGGT         |
| <i>4ebp</i>         | F: CCAGGAAGGTTGTCATCTCG<br>R: CCAGGAGTGTTGGAGTAGAGG        |
| <i>upd2</i>         | F: CACAAGTGCGGTGAAGCTAA<br>R: GGCTCTT CTGCTGATCCTTG        |
| <i>upd3</i>         | F: GCCCTCTCACCAAACCTGAA<br>R: TTTCTTCTGGATCGCCTTTG         |
| <i>spi</i>          | F: CCTTCTATTTGCGCTTCGAG<br>R: CGCATGTGGTAGGGTAGCTT         |
| <i>krm</i>          | F: CGTGTGTTGGCAACAACAAGT<br>R: TGTGGCAATGCAGTTTAAGG        |
| <i>vn</i>           | F: AACGCAGAGGTCACGAAGAT<br>R: GCGCACTATTAGCTCGGAAC         |
| <i>puc</i>          | F: CATGTGGCTAGCAATTTGA<br>R: GTCTTCGAAAAACGTACAGC          |
| <i>soc36</i>        | F: CAGTCAGCAATATGTTGTCG<br>R: ACTTGCAGCATCGTCGCTTC         |

All primers are displayed in 5'-3' direction.

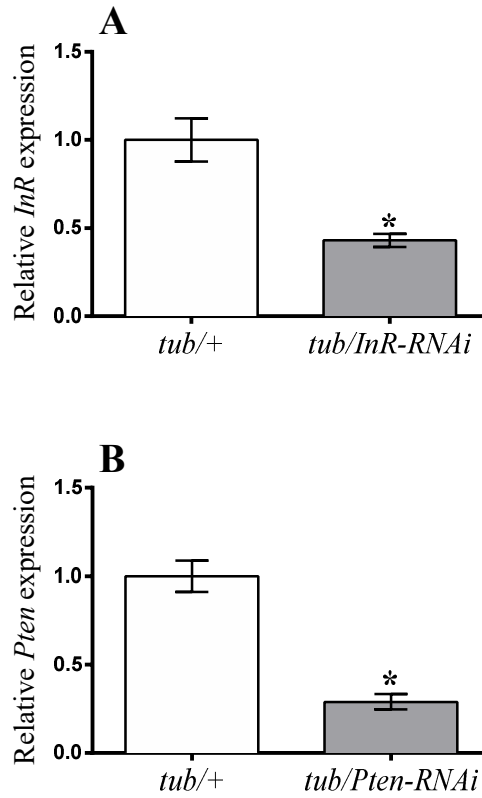

Strilbytska et al., Fig. S1

**Figure S1.** Relative *InR* and *Pten* expression in flies with IIS inhibition/activation in whole *Drosophila* body. The differences between means ( $\pm$ SEM) were compared by Student's *t*-test. Asterisk shows difference from control group (*tub/+*),  $p < 0.05$ ;  $n = 5$ .

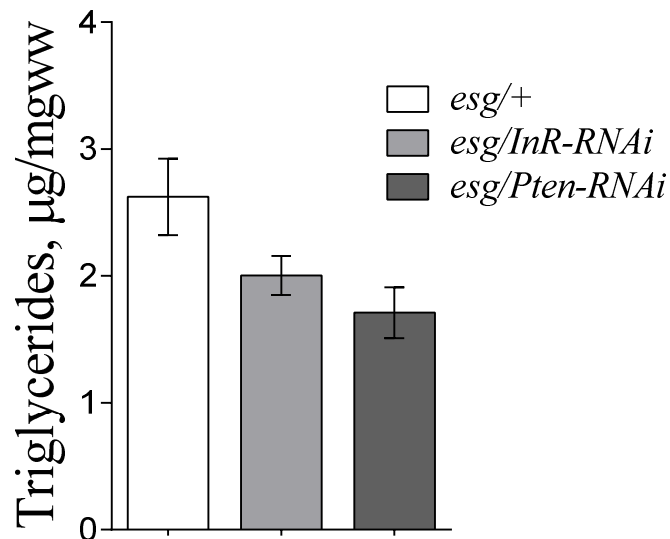

**Figure S2.** Amount of TAG of flies with IIS modulated in stem and progenitor cells. Results represent the mean  $\pm$  SEM of 4-5 replicates per genotype. Group comparisons were performed using ANOVA followed by Newman-Keuls post-hoc test.

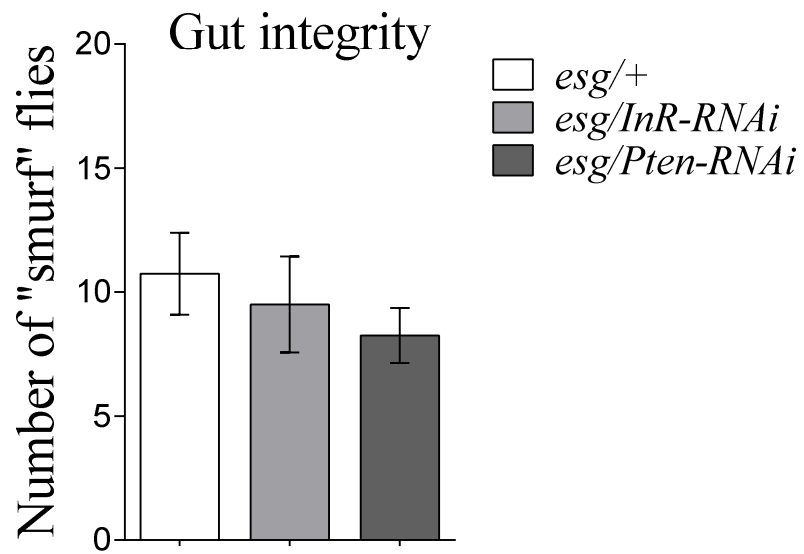

**Figure S3.** Number of “smurf” flies, an indicator of gut integrity, in control, *InR-RNAi*- and *Pten-RNAi*-expressing flies. The measurements were repeated every 5 days for up to 30 days (on 1, 5, 10, 15, 20, 25, 30 day). However, data for *esg/InR-RNAi* genotype represent the results of measurements made on the 1-st experimental day (seventh days after fly switch to 29°C and induction of RNAi expression). Bars represent mean values ± SEM for 5 replicates.
